# Supplementary material
Source: publisher figshare collection journal article supplement (https://acs.figshare.com/ndownloader/files/4163650)
Supplement: Supplementary file 1 [file 4163650]

# Generalized Synthesis of Hybrid Metal-Semiconductor Nanostructures tunable from the Visible to the Infrared

*Bishnu P. Khanal,<sup>1 †</sup> Anshu Pandey,<sup>1 †</sup> Liang Li,<sup>1</sup> Qianglu Lin,<sup>2</sup> Wan Ki Bae,<sup>1</sup> Hongmei Luo,<sup>2</sup> Victor I. Klimov,<sup>1</sup> and Jeffrey M. Pietryga<sup>1\*</sup>*

<sup>1</sup>Chemistry Division, Los Alamos National Laboratory, Los Alamos, New Mexico 87545

<sup>2</sup>Department of Chemical Engineering, New Mexico State University, Las Cruces, New Mexico 88003

<sup>†</sup>These authors contributed equally to this work

\*To whom correspondence should be addressed: [pietryga@lanl.gov](mailto:pietryga@lanl.gov)

## Supporting Information

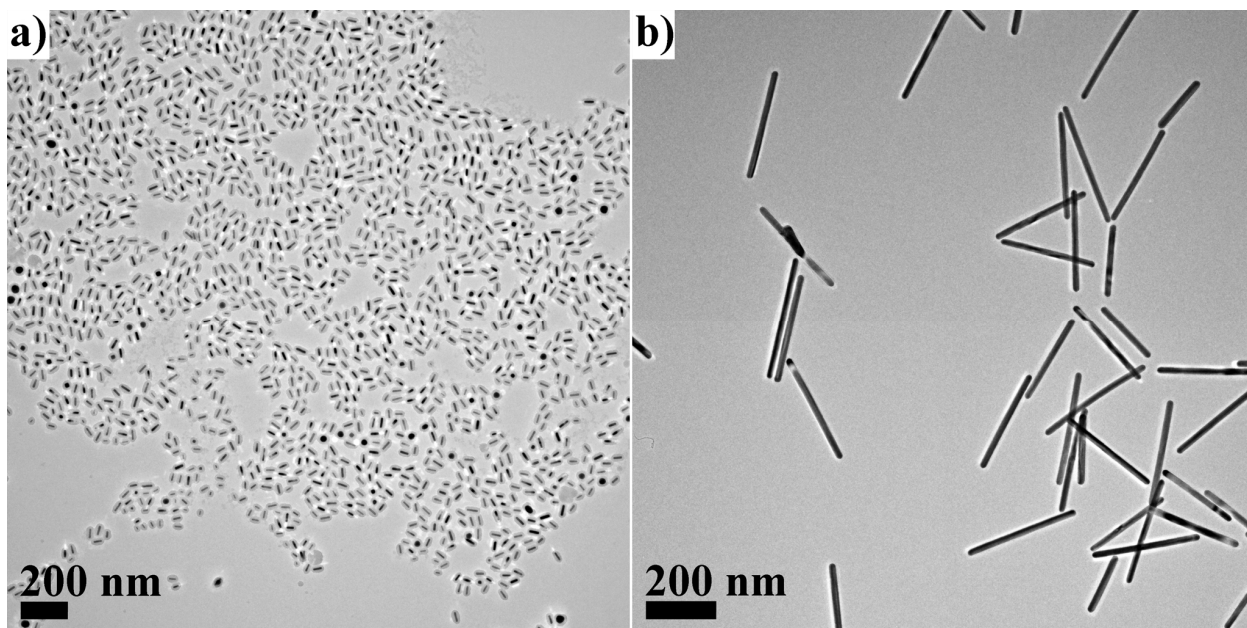

**Figure S1.** Low magnification TEM image of silica coated single crystalline AuNRs (a) and pentahedrally twinned AuNRs (b).

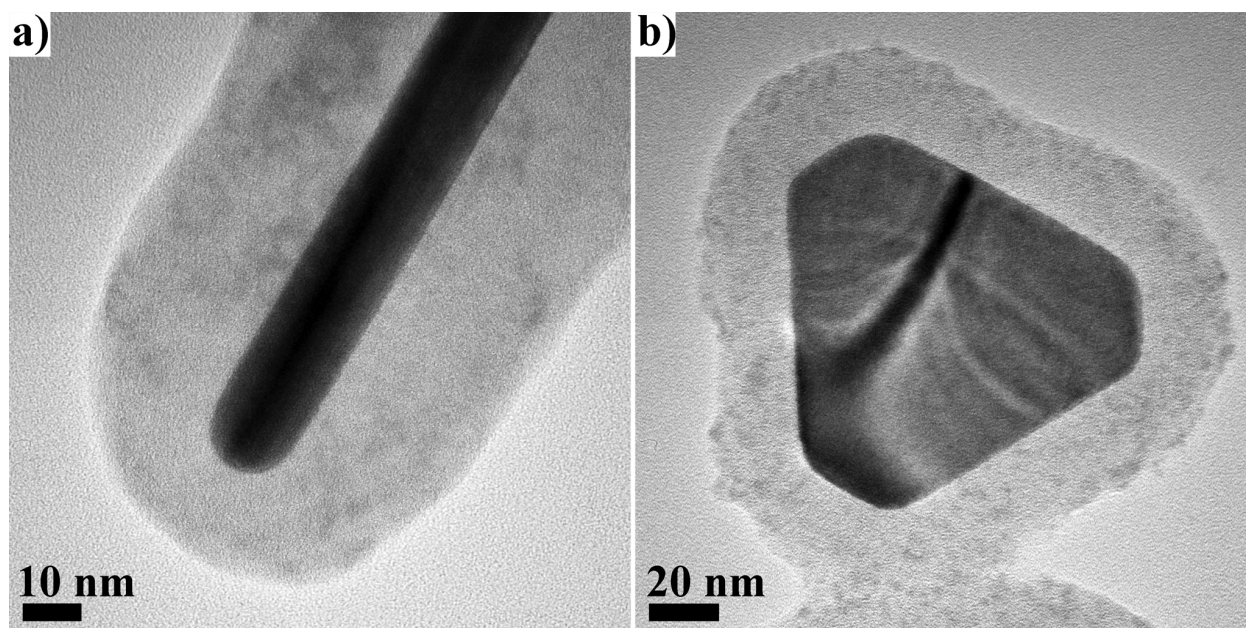

**Figure S2.** High magnification TEM image of a) pentahedrally twinned AuNR/SiO<sub>2</sub>/CdSe NQDs b) CdSe NQDs on silica coated multifaceted triangular shaped gold nanoplatelets.

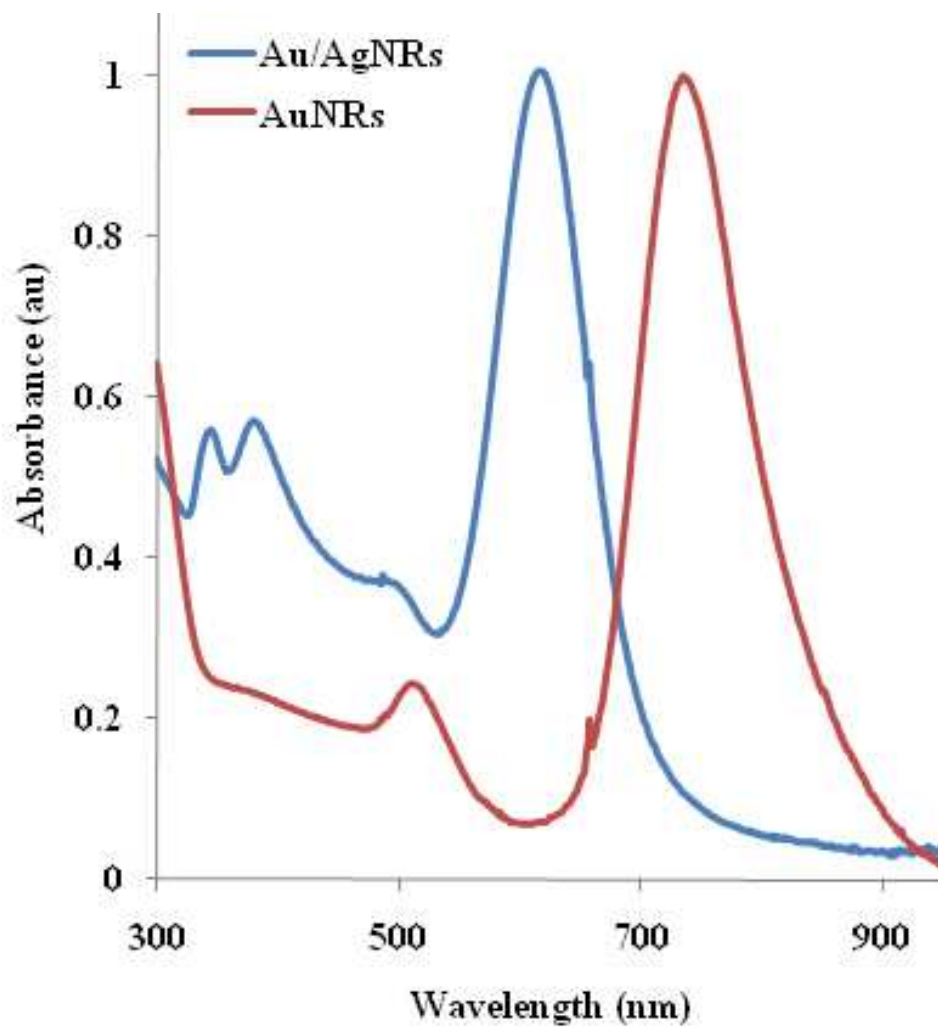

**Figure S3.** UV-Vis spectra of Au NRs and Au/Ag bi-metallic nanorods

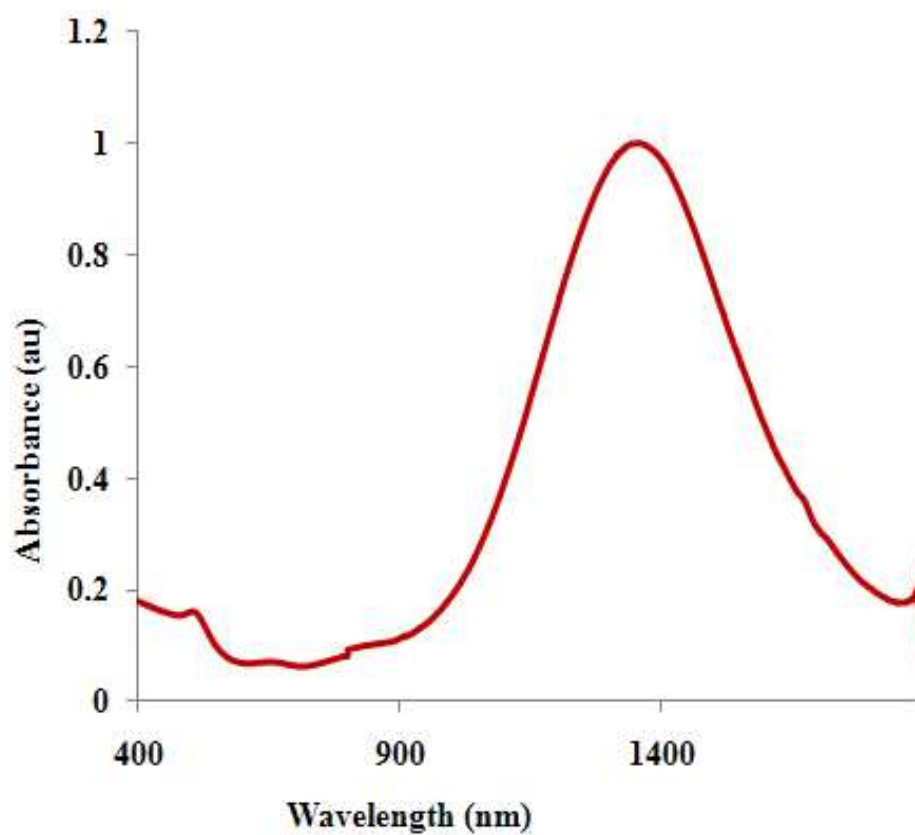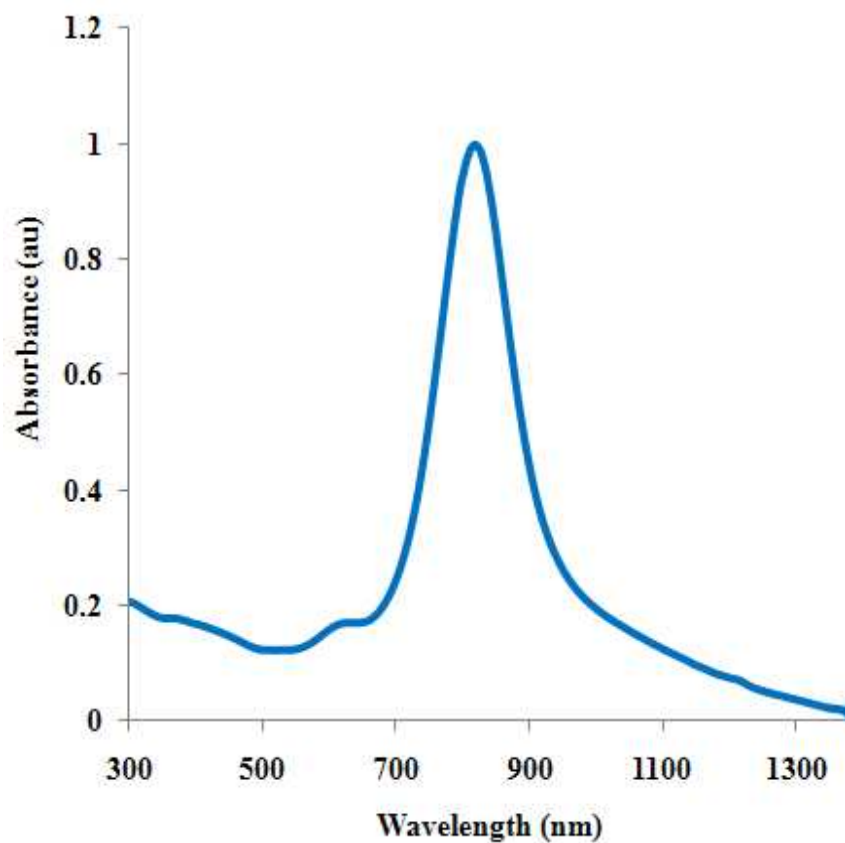

**Figure S4.** UV-Vis-NIR spectrum of pentahedrally twinned Au NRs (red) and 2D platelets (blue)



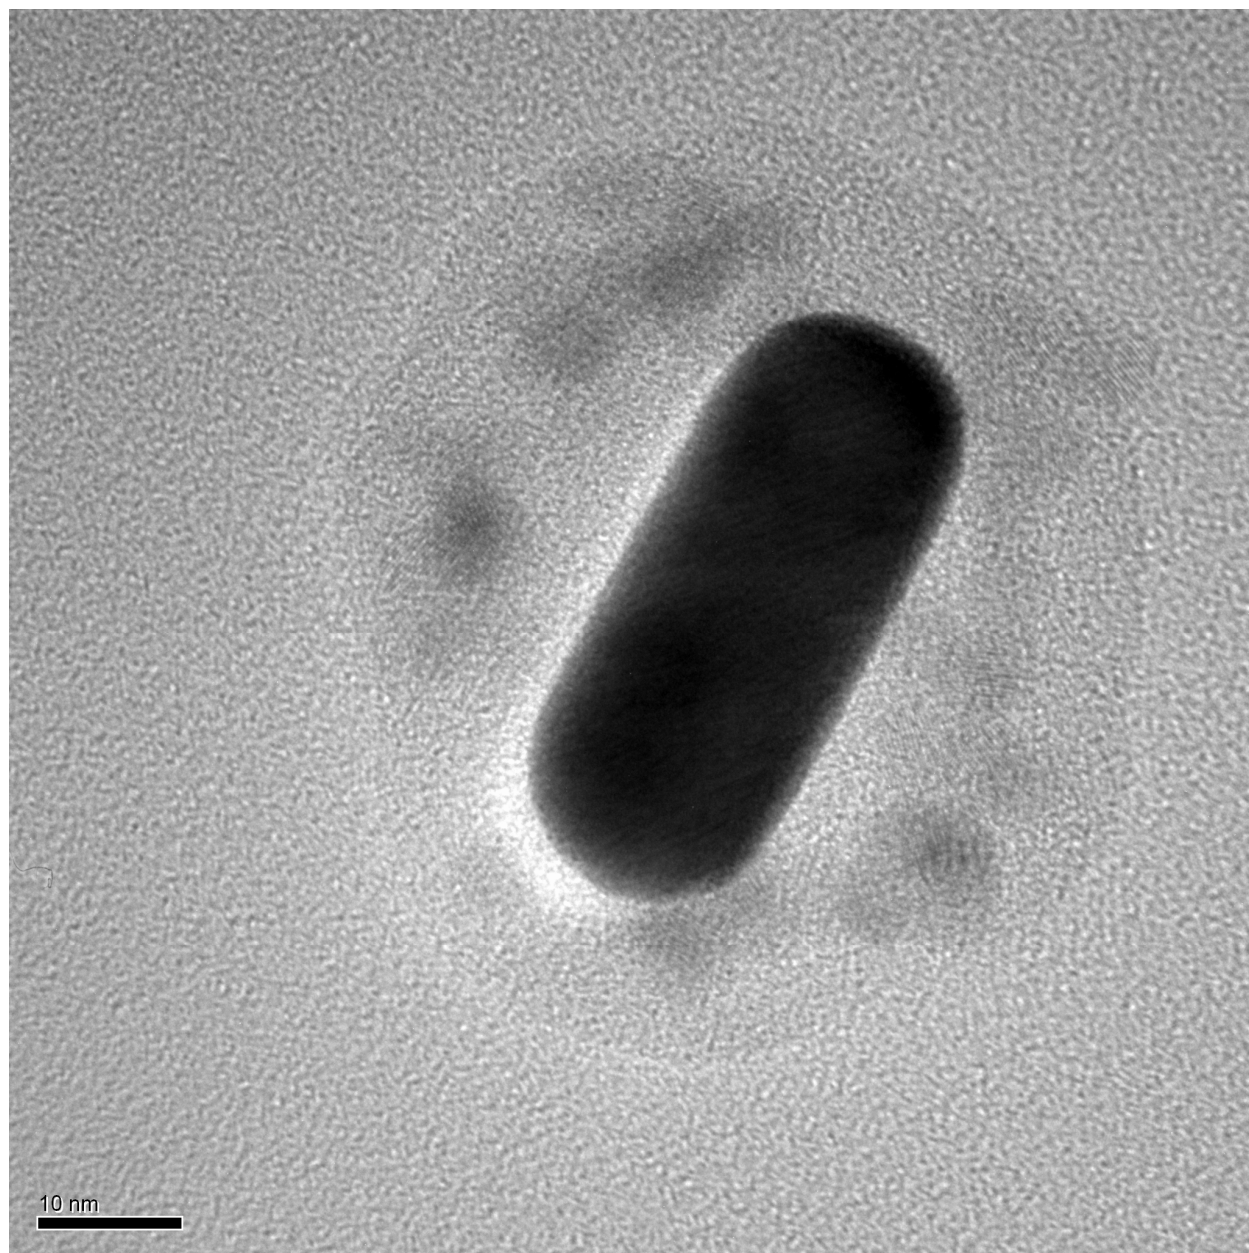

**Figure S5.** TEM image of CIS/CdS NC on an AuNR/SiO<sub>2</sub> structure.

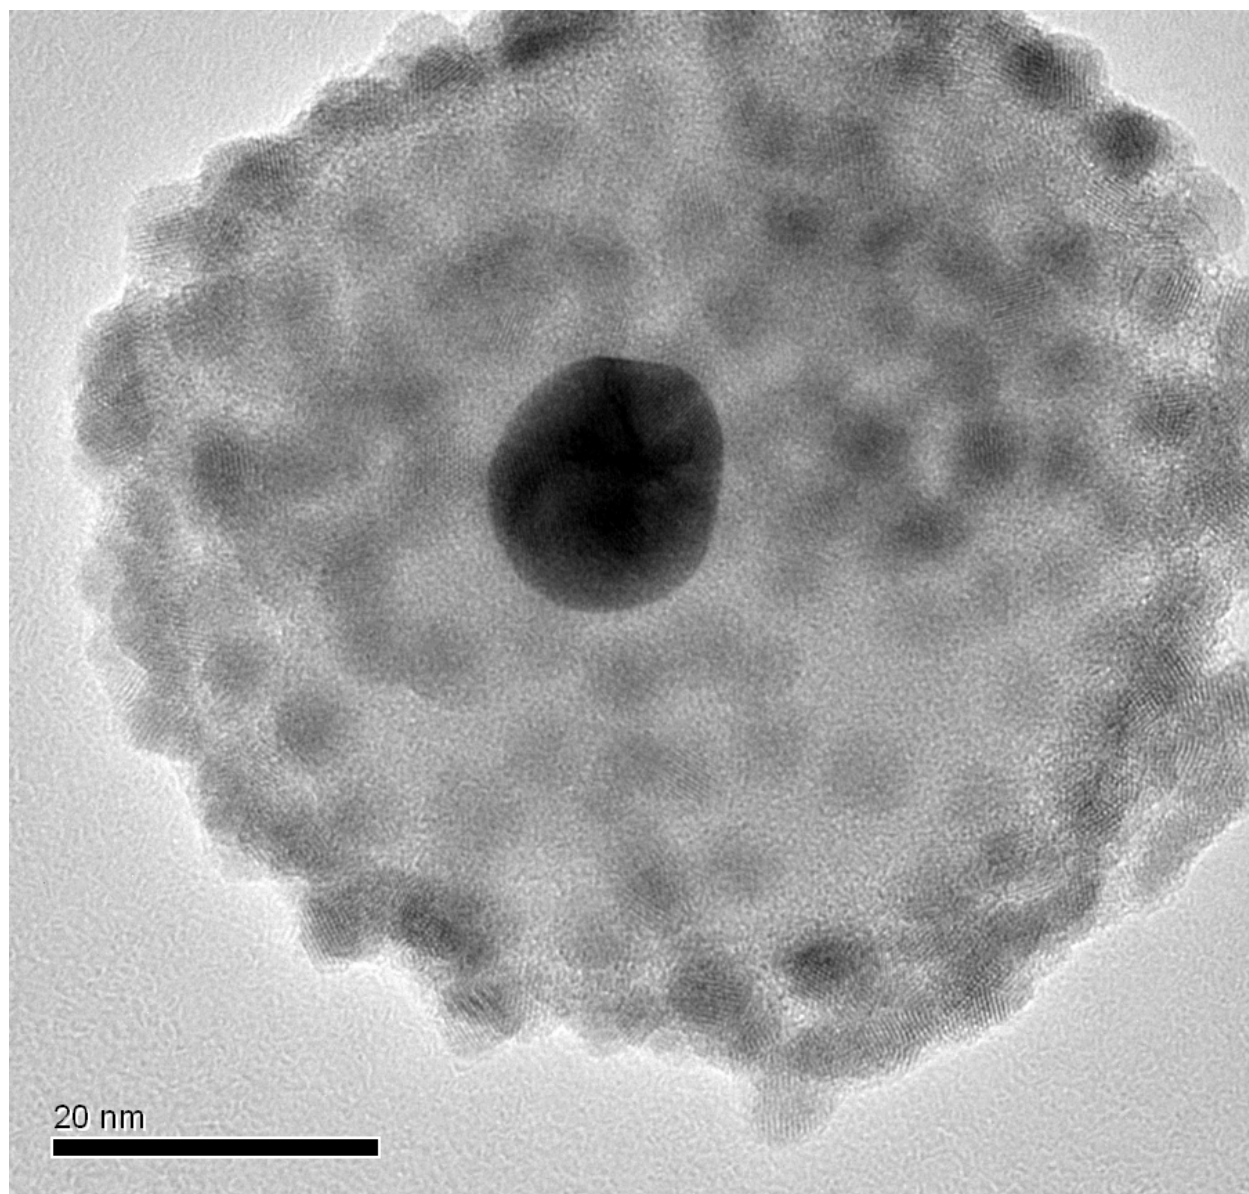

**Figure S6.** TEM image of single Au NP|SiO<sub>2</sub>|PbSe/CdSe superstructure (same sample as Figure 5).

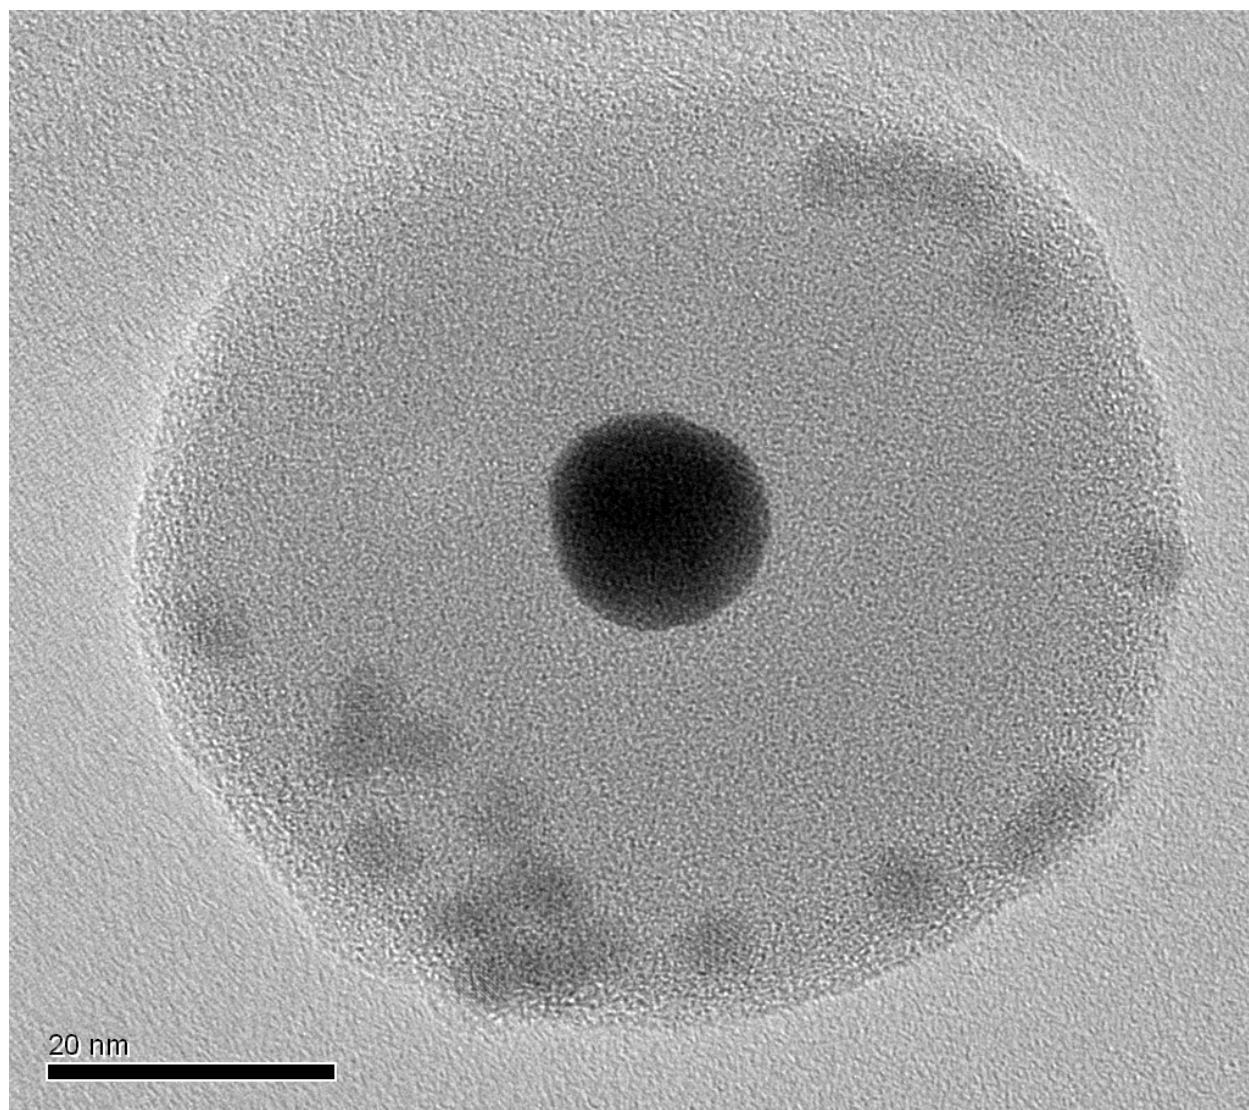

**Figure S7.** TEM image of single Au NP@SiO<sub>2</sub>@PbSe/CdSe superstructure with lower loading.

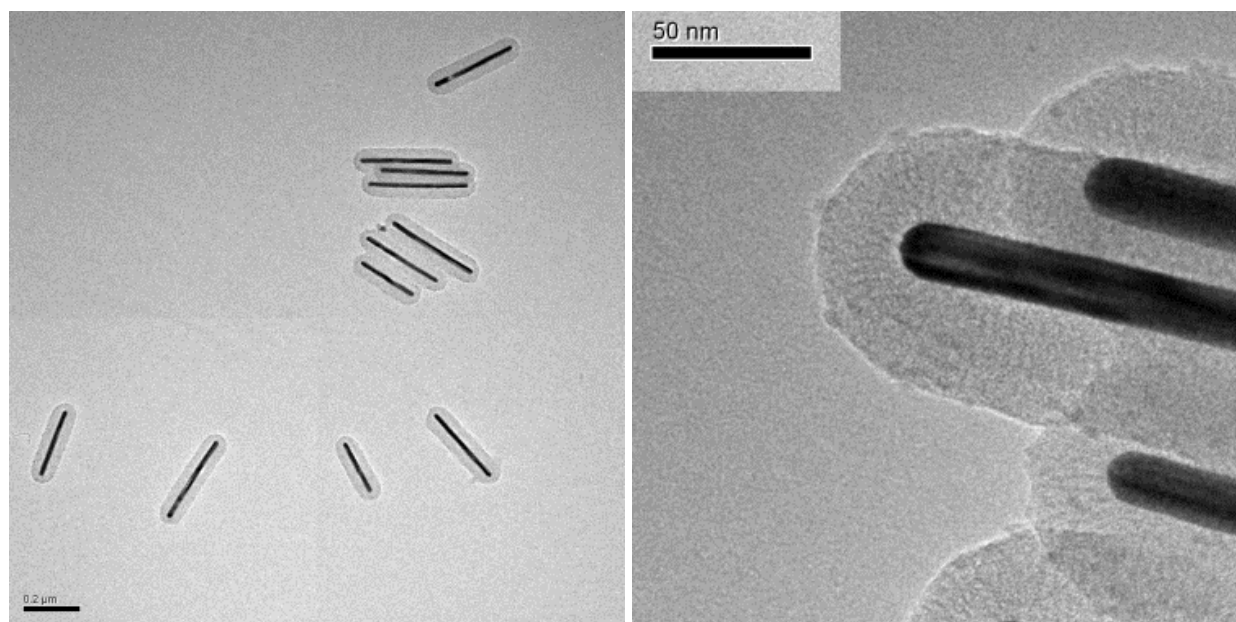

**Figure S8.** TEM images of CdSe/ZnS NCs on AuNR structures. Note the absence of free NCs in the wide area image of the left panel.

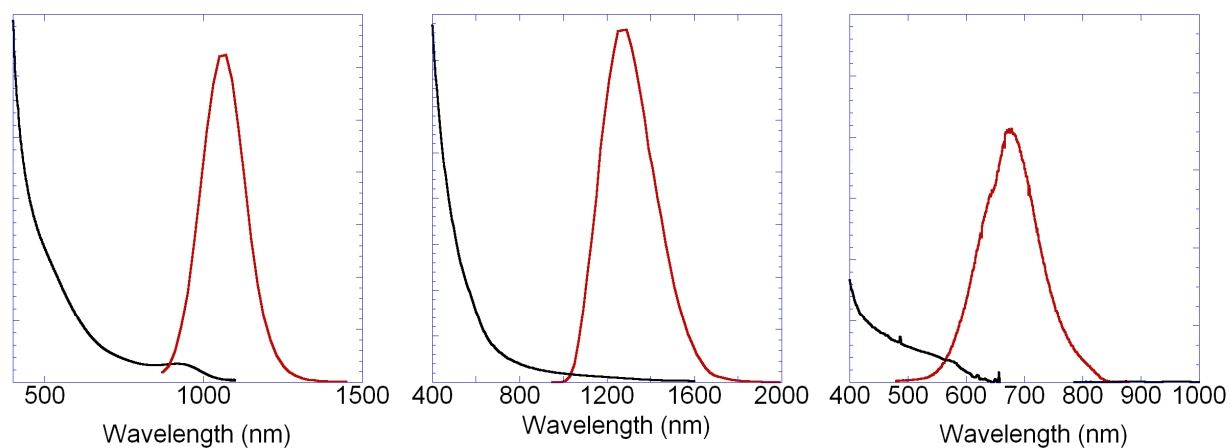

**Figure S9.** PL and Absorption spectra of (from left to right) PbS/CdS, PbSe/CdSe and CIS/CdS NCs used in figure 4 in the text.

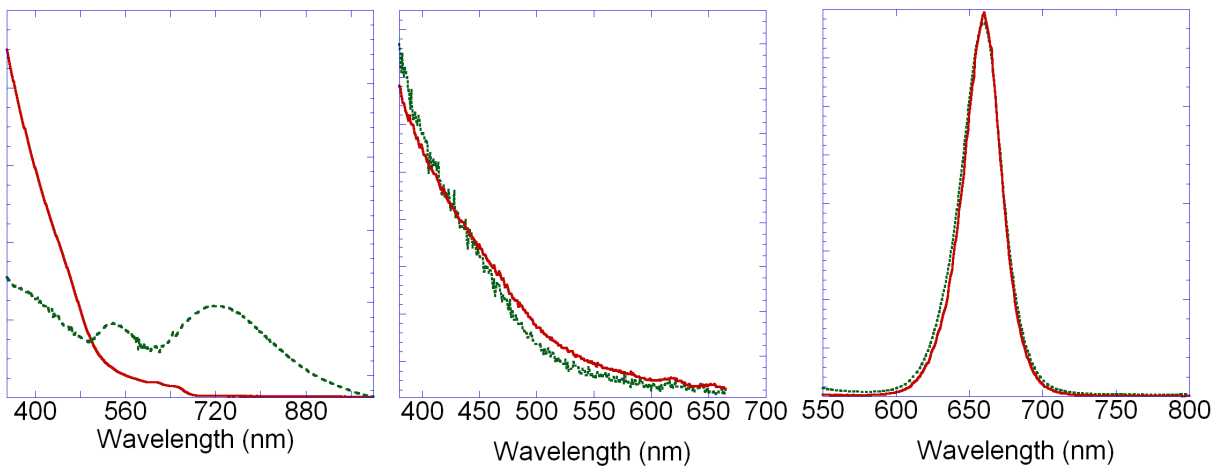

**Figure S10.** Comparison of spectra of CdSe/ZnS NC before attachment (red, solid) and Au NR-based superstructure after attachment (dashed green). From left to right: absorption, PLE and PL spectra. Spectra are normalized to allow meaningful comparison.
